# Supplementary material for: Metal-free Minisci C–H alkylation of hydrazones using aldehydes: an unexpected route to hydrazone-containing pyrimidine derivatives
Source: Royal Society of Chemistry journal article supplement (doi:10.1039/d6ra01465h), 2026-04-29

## Supporting Information

### Metal-Free Minisci C–H Alkylation of Hydrazones Using Aldehydes : An Unexpected Route to Hydrazone-Containing Pyrimidine Derivatives

*Atefeh Tirehdast<sup>1</sup>, Volodymyr Semeniuchenko<sup>2</sup>, Ali Shiri<sup>1\*</sup>*

*<sup>1</sup>Department of Chemistry, Faculty of Science, Ferdowsi University of Mashhad, Mashhad,  
Iran.*

*<sup>2</sup>Department of Chemistry and Biomolecular Sciences, Faculty of Science, University of  
Ottawa, Ottawa, Canada.*

*\*Corresponding Author E-mail: [alishiri@um.ac.ir](mailto:alishiri@um.ac.ir)*

| <b>Table of contents</b>                                                                   | <b>pages</b> |
|--------------------------------------------------------------------------------------------|--------------|
| 1. <sup>1</sup> H, and <sup>13</sup> C NMR spectra of compounds (2), (3), (I), (4a-f)..... | S2-19        |
| 2. D <sub>2</sub> O-exchangeable spectrum of compound (4a).....                            | S20          |

# <sup>1</sup>H NMR spectrum of compound (2)

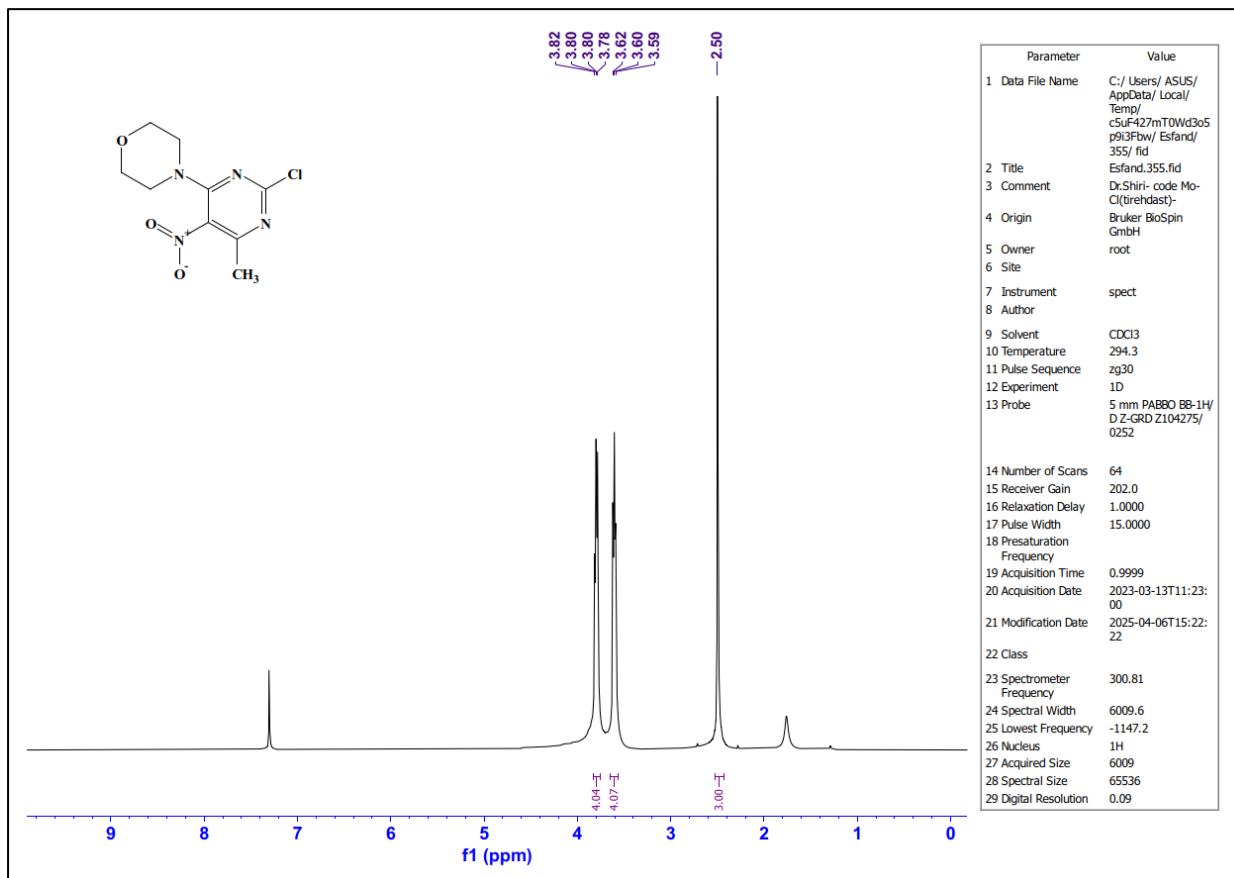

# <sup>13</sup>C NMR spectrum of compound (2)

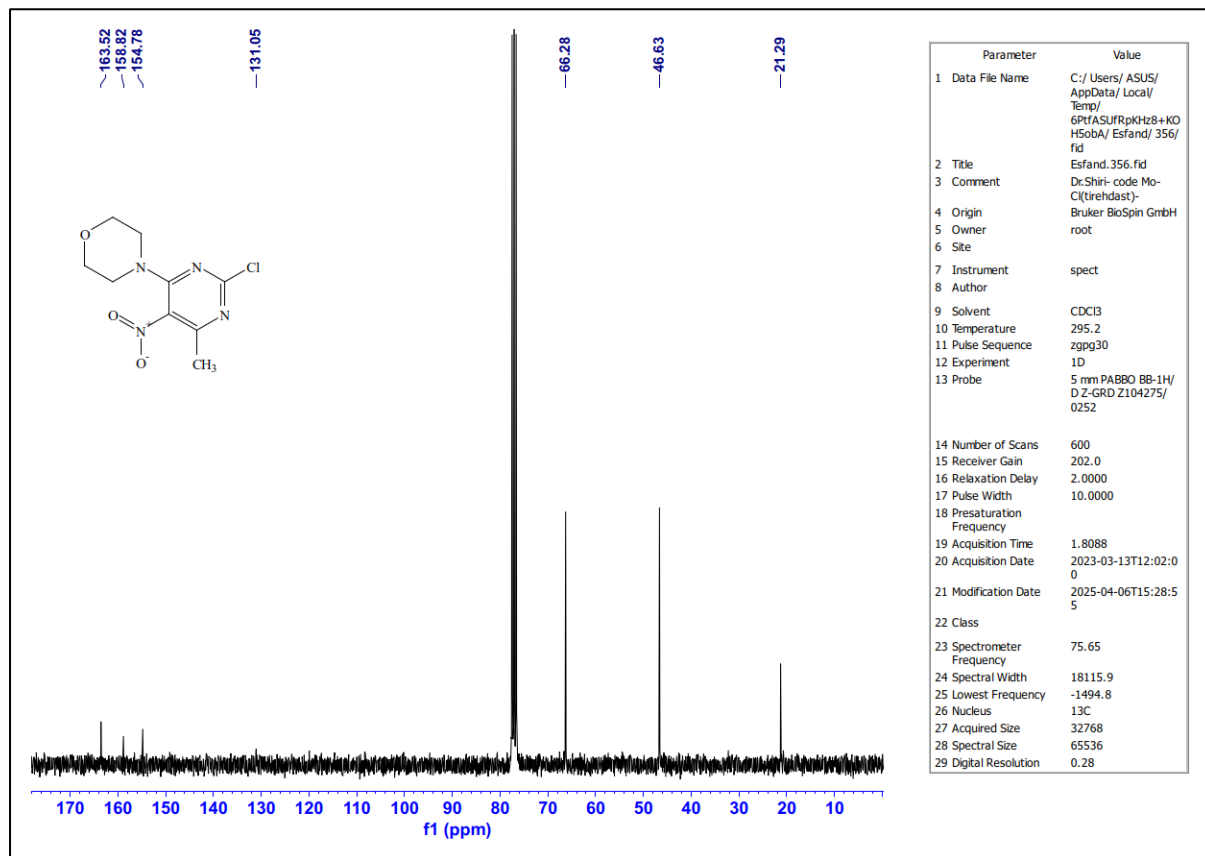

# <sup>1</sup>H NMR spectrum of compound (3)

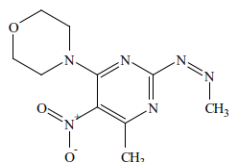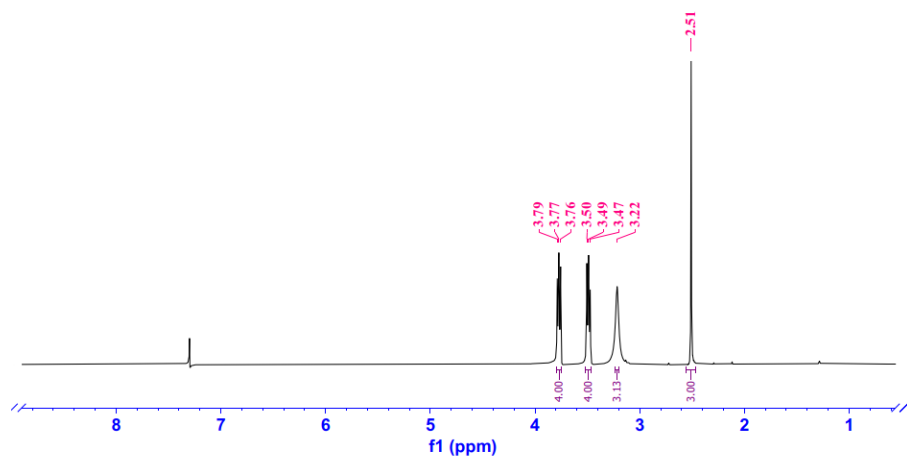

| Parameter                  | Value                                                                |
|----------------------------|----------------------------------------------------------------------|
| 1 Data File Name           | C:/Users/Atefe/AppData/Local/Temp/DNILbXQ56m71Cj5yXMkkWj/Mehr/55/fid |
| 2 Title                    | Mehr55.fid                                                           |
| 3 Comment                  | DrShiri- code DE1(trehdast)-                                         |
| 4 Origin                   | Bruker BioSpin GmbH                                                  |
| 5 Owner                    | root                                                                 |
| 6 Site                     |                                                                      |
| 7 Instrument               | spect                                                                |
| 8 Author                   |                                                                      |
| 9 Solvent                  | CDCl3                                                                |
| 10 Temperature             | 295.0                                                                |
| 11 Pulse Sequence          | zg30                                                                 |
| 12 Experiment              | 1D                                                                   |
| 13 Probe                   | 5 mm PABBO BB-1H/ D Z-GRD Z104275/ 0252                              |
| 14 Number of Scans         | 128                                                                  |
| 15 Receiver Gain           | 158.2                                                                |
| 16 Relaxation Delay        | 1.0000                                                               |
| 17 Pulse Width             | 15.0000                                                              |
| 18 Presaturation Frequency |                                                                      |
| 19 Acquisition Time        | 0.9999                                                               |
| 20 Acquisition Date        | 2023-09-25T10:52:00                                                  |
| 21 Modification Date       | 2025-08-25T17:41:52                                                  |
| 22 Class                   |                                                                      |
| 23 Spectrometer Frequency  | 300.81                                                               |
| 24 Spectral Width          | 6009.6                                                               |
| 25 Lowest Frequency        | -1147.2                                                              |
| 26 Nucleus                 | 1H                                                                   |
| 27 Acquired Size           | 6009                                                                 |
| 28 Spectral Size           | 65536                                                                |
| 29 Digital Resolution      | 0.09                                                                 |

# <sup>13</sup>C NMR spectrum of compound (3)

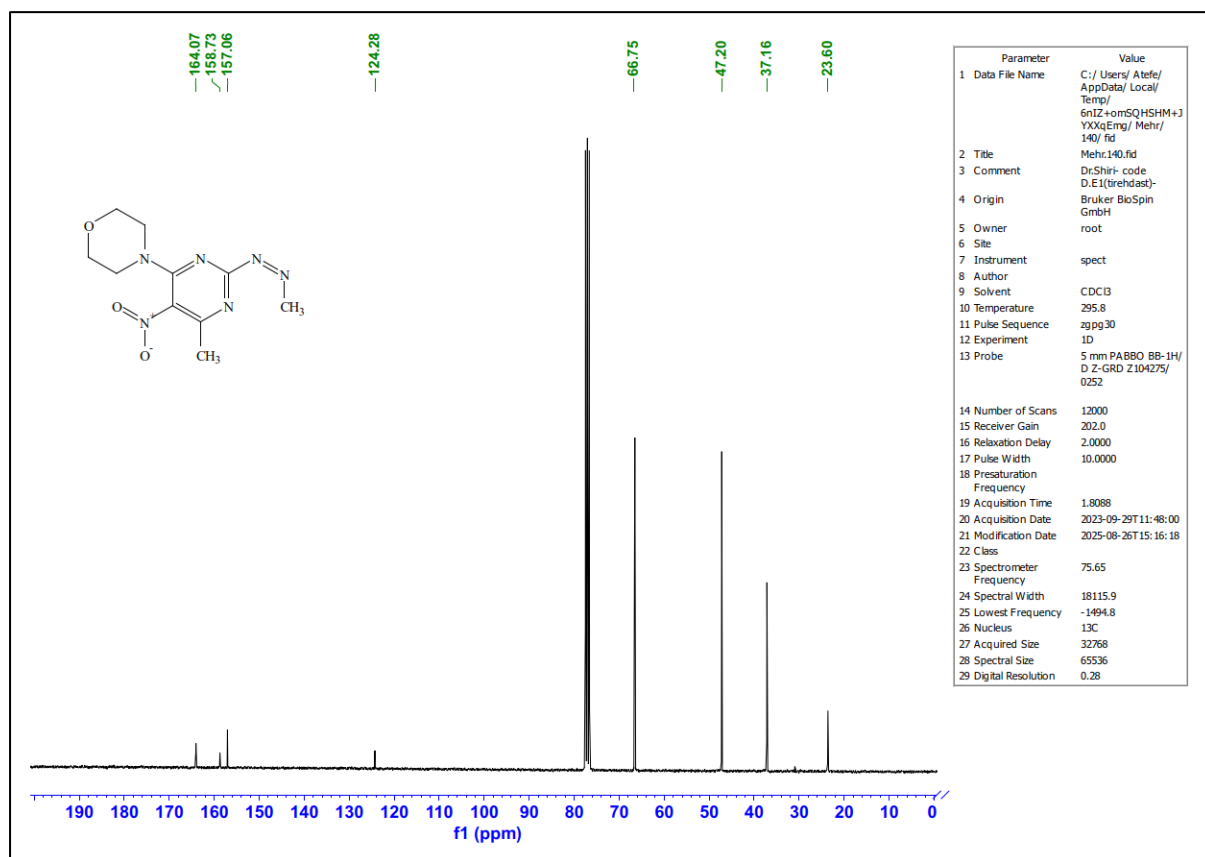

# <sup>1</sup>H NMR spectrum of compound (I)

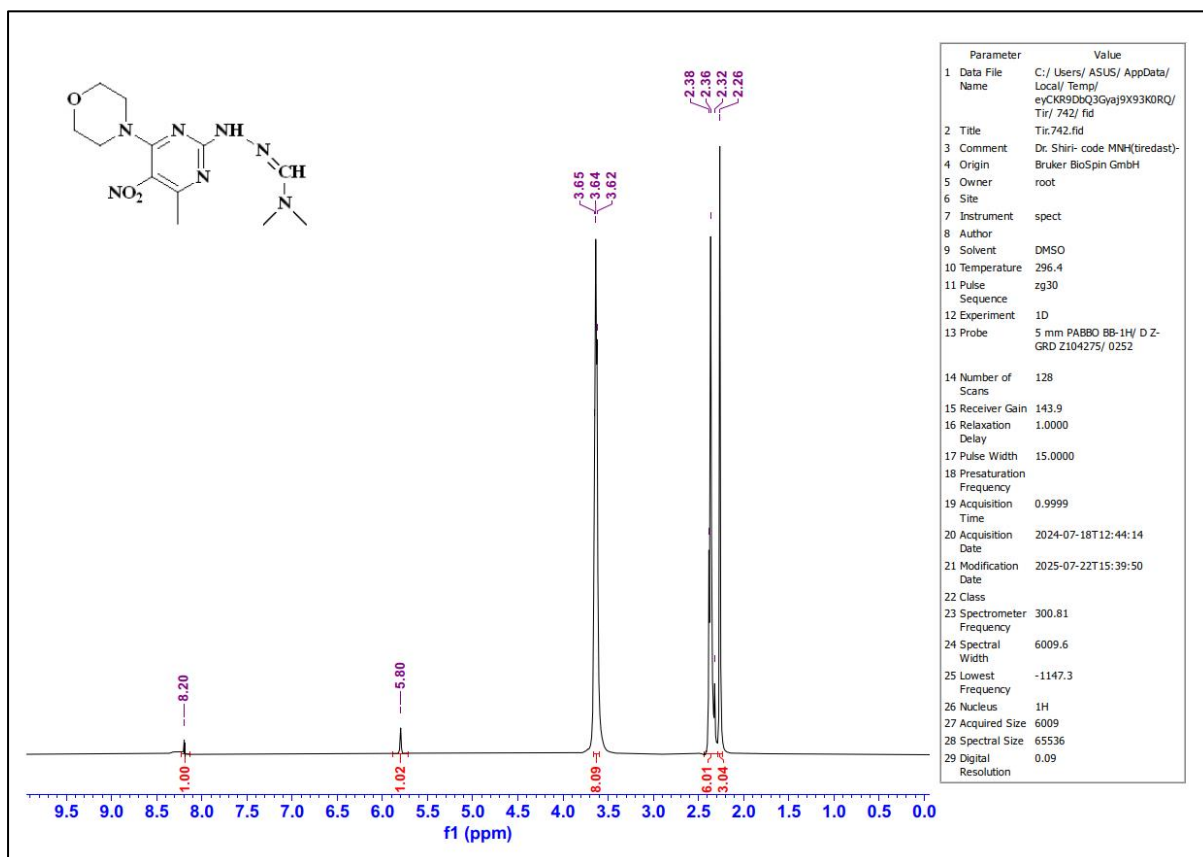

# <sup>13</sup>C NMR spectrum of compound (I)

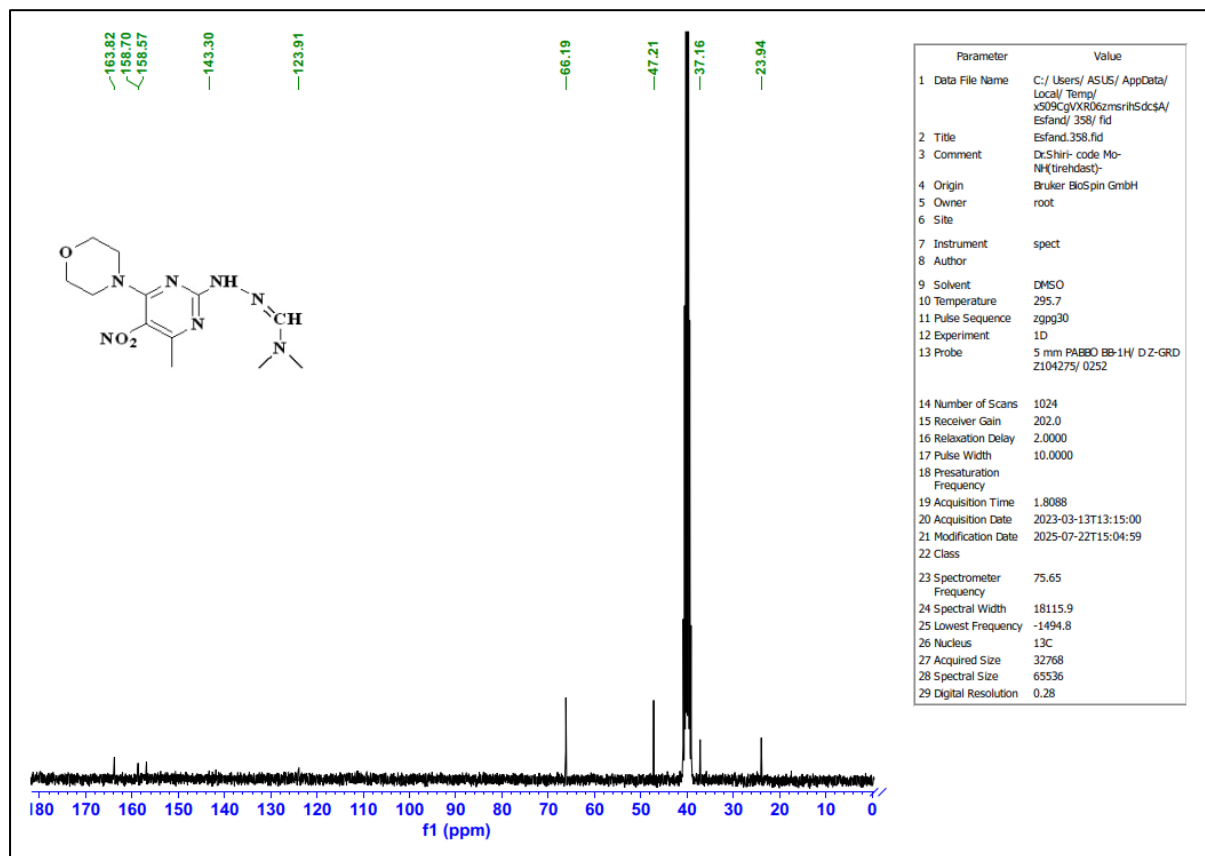

<sup>1</sup>H NMR spectrum of compound (4a)

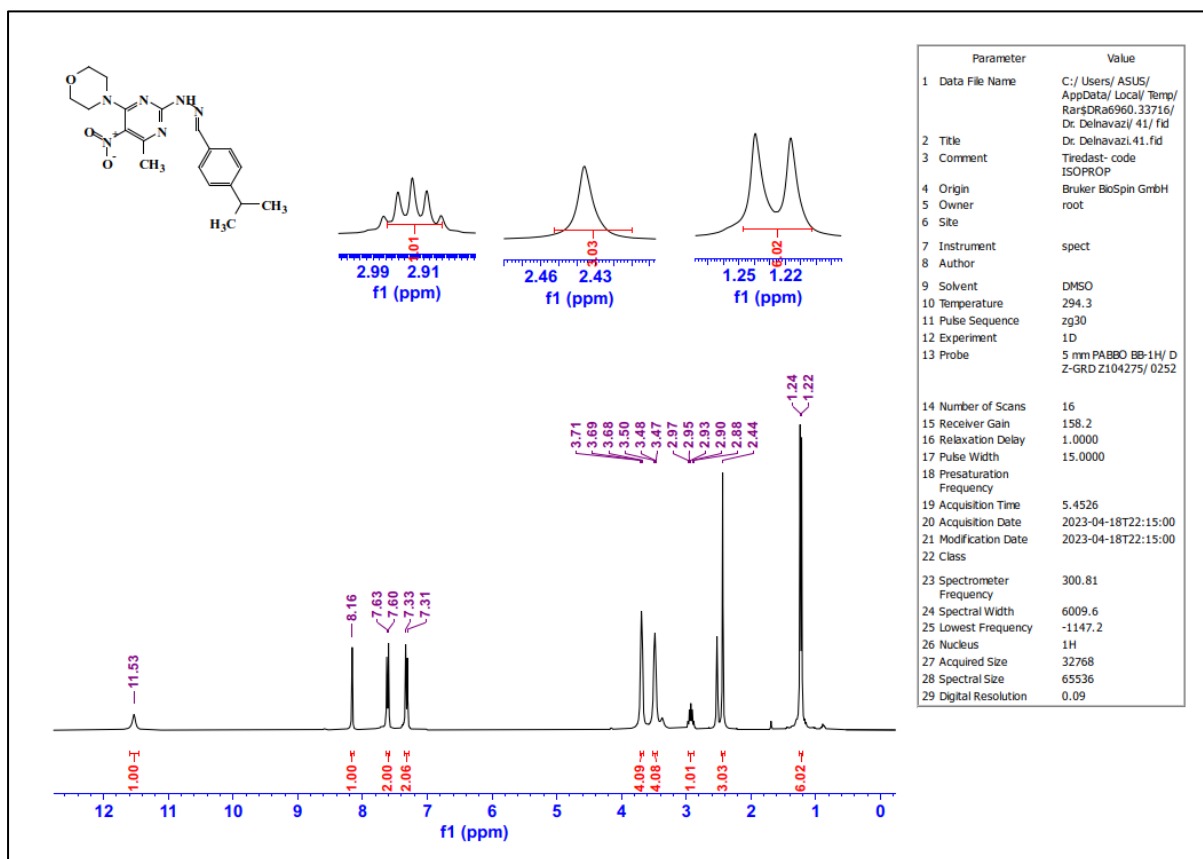

# <sup>13</sup>C NMR spectrum of compound (4a)

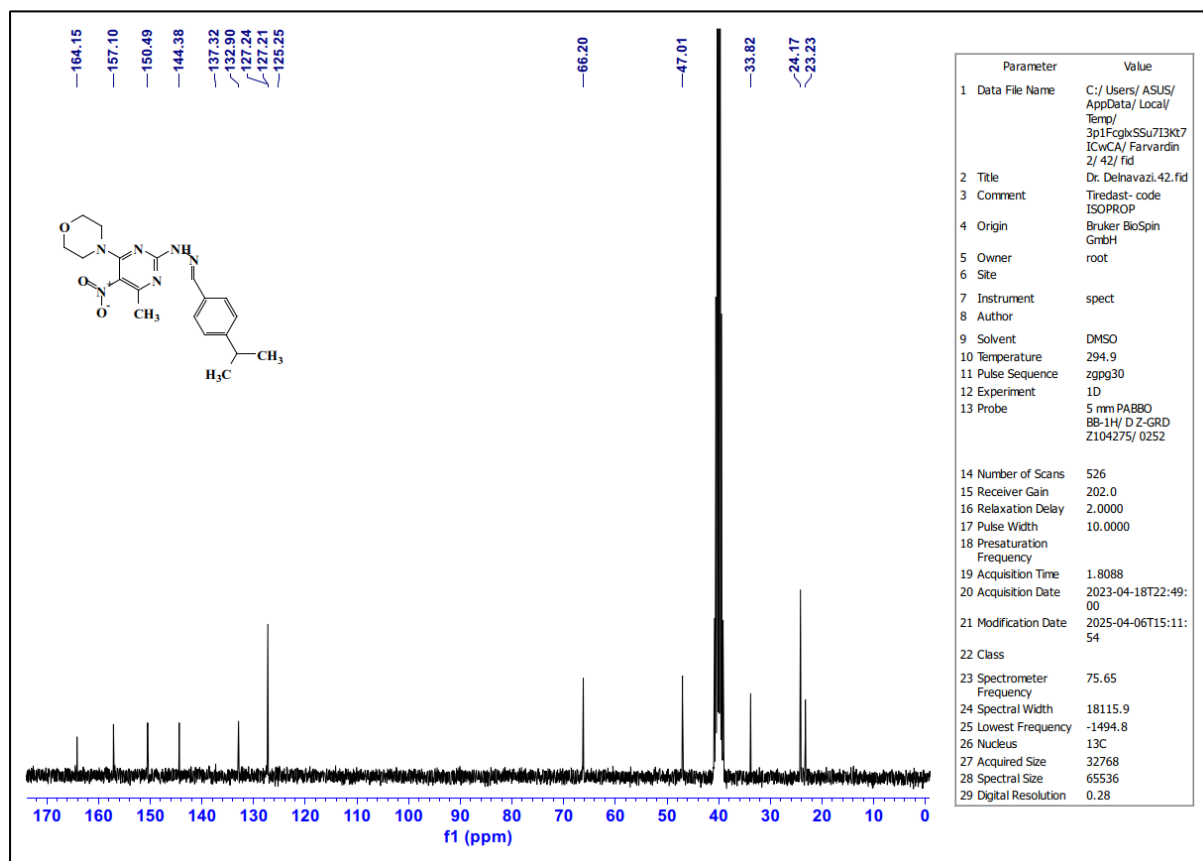

<sup>1</sup>H NMR spectrum of compound (**4b**)

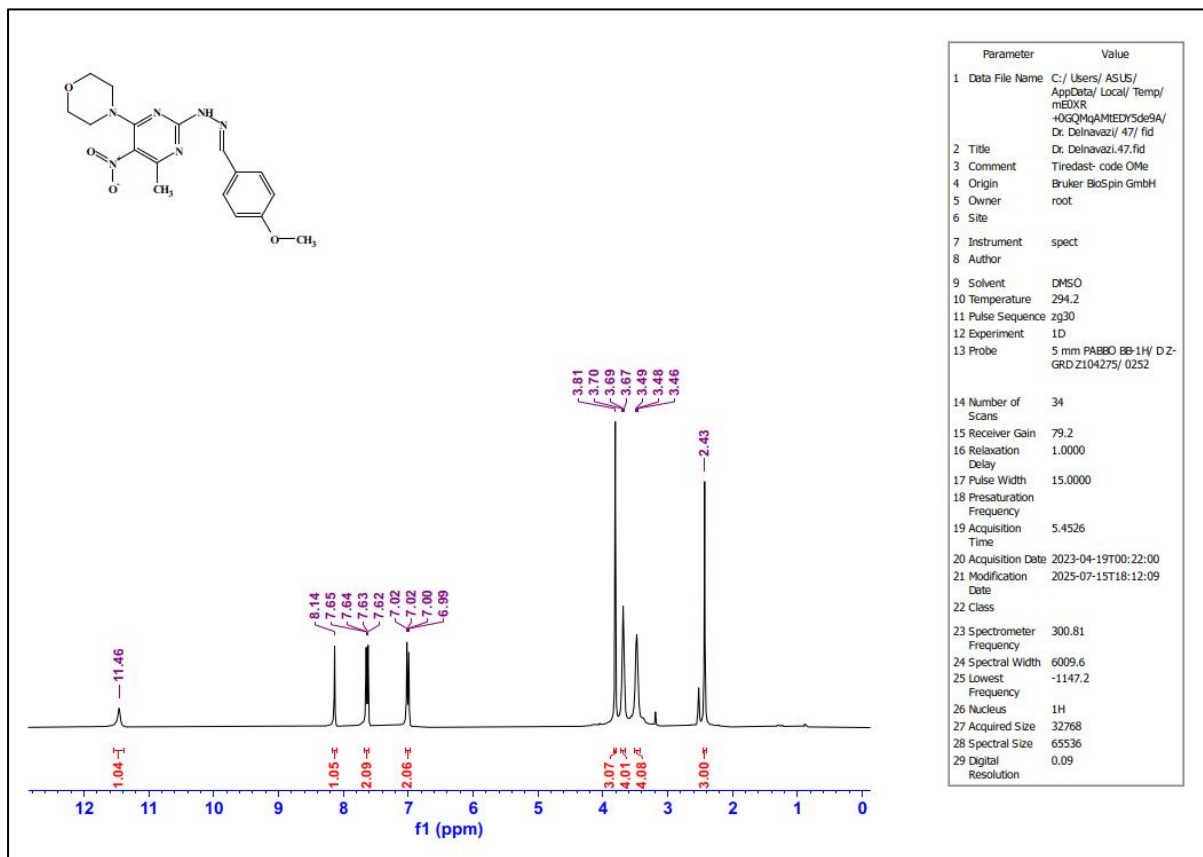

<sup>13</sup>C NMR spectrum of compound (4b)

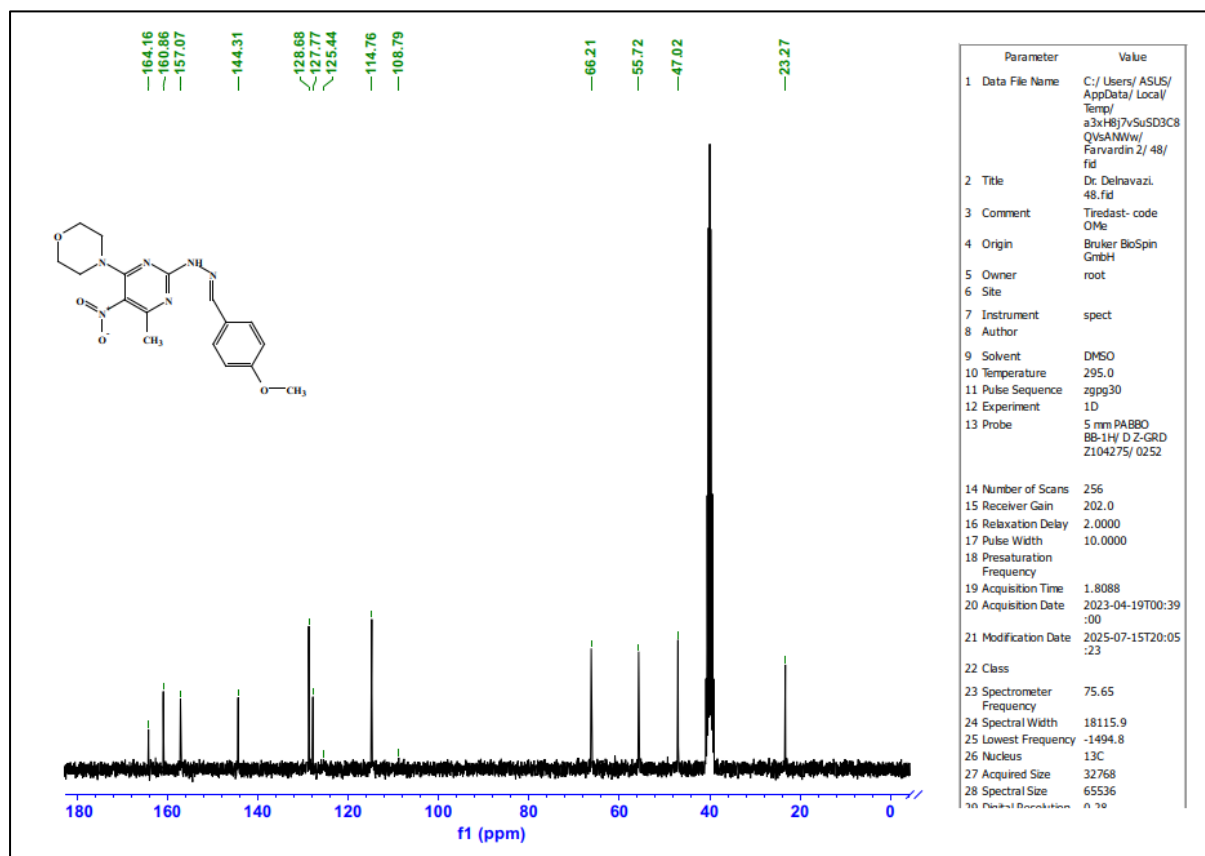

<sup>1</sup>H NMR spectrum of compound (4c)

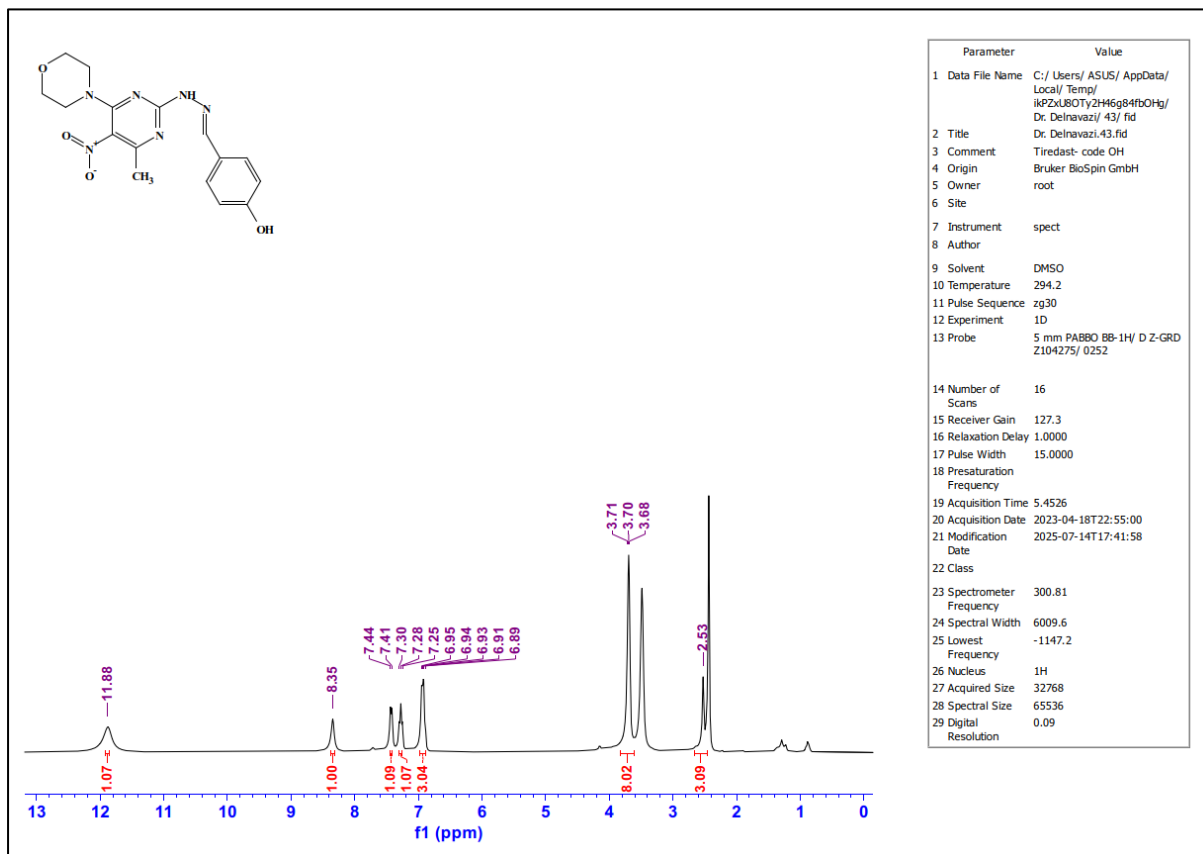

<sup>13</sup>C NMR spectrum of compound (4c)

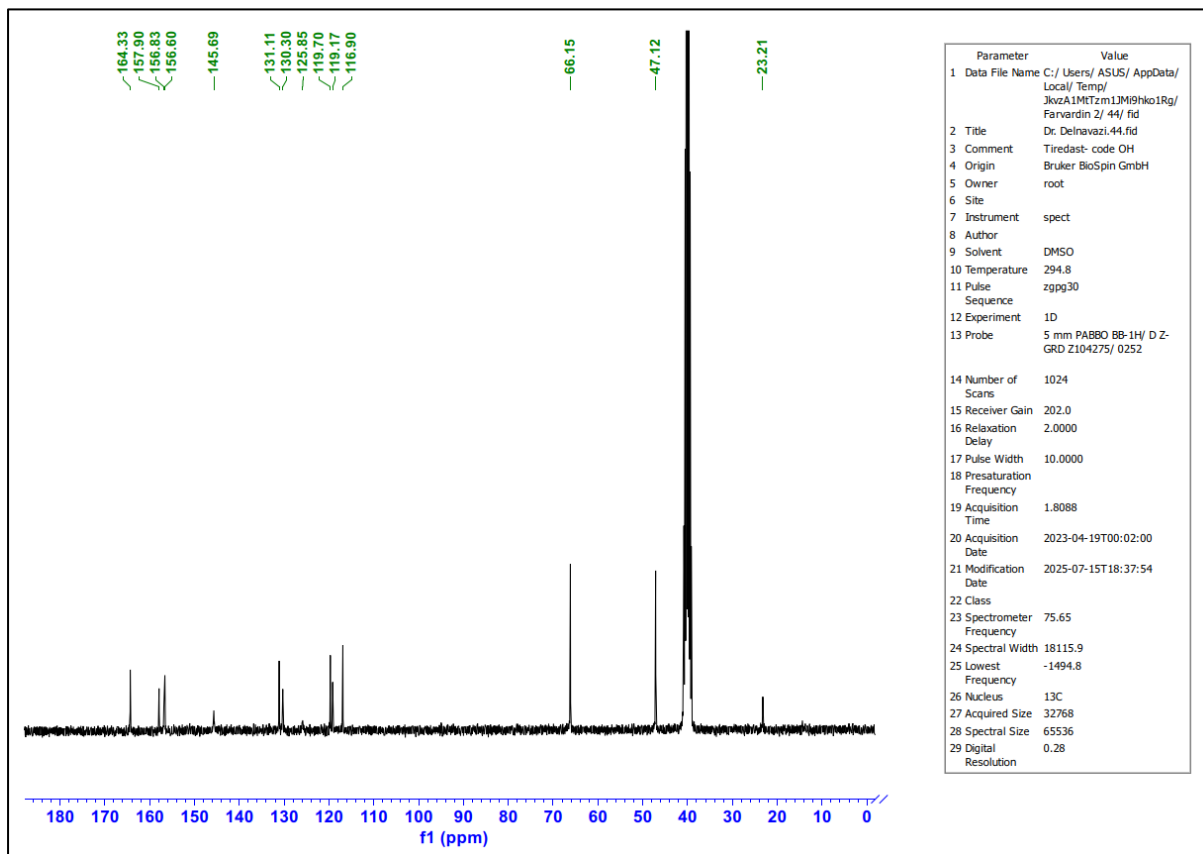

# <sup>1</sup>H NMR spectrum of compound (4d)

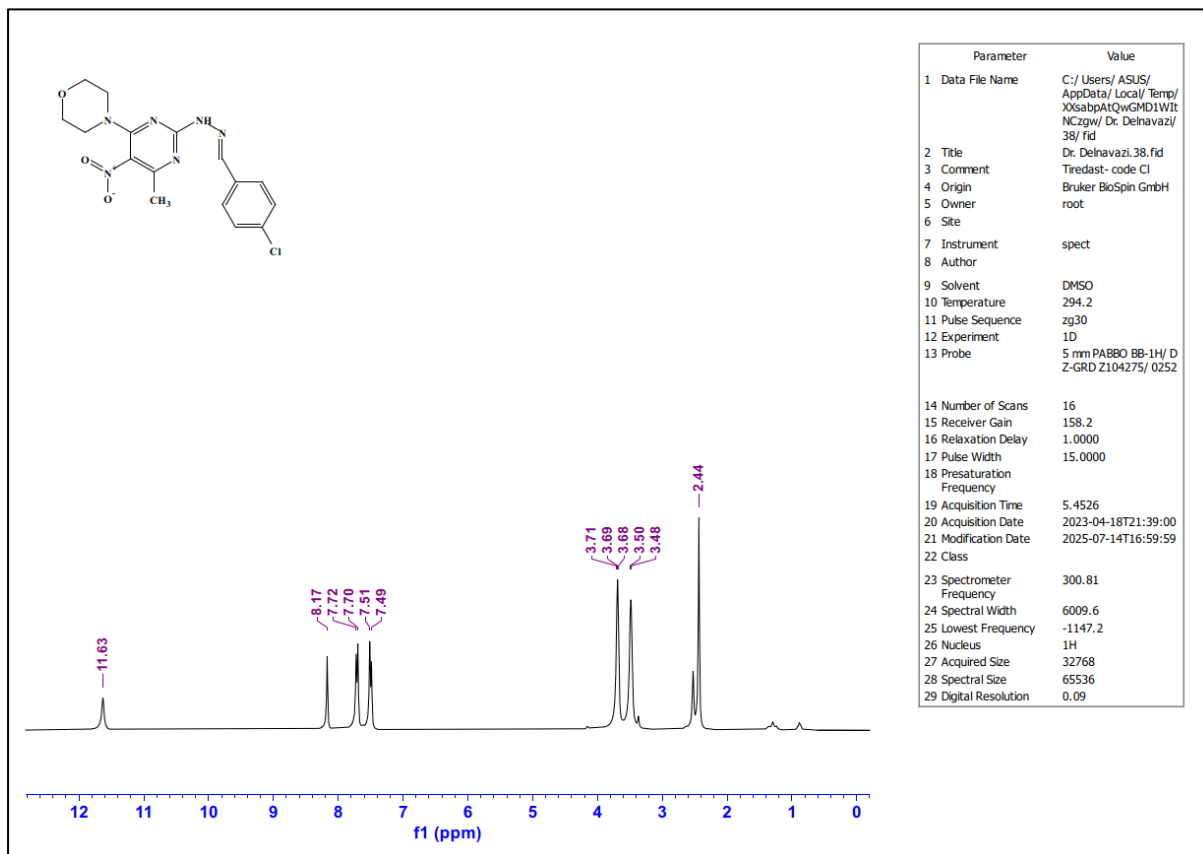

<sup>13</sup>C NMR spectrum of compound (4d)

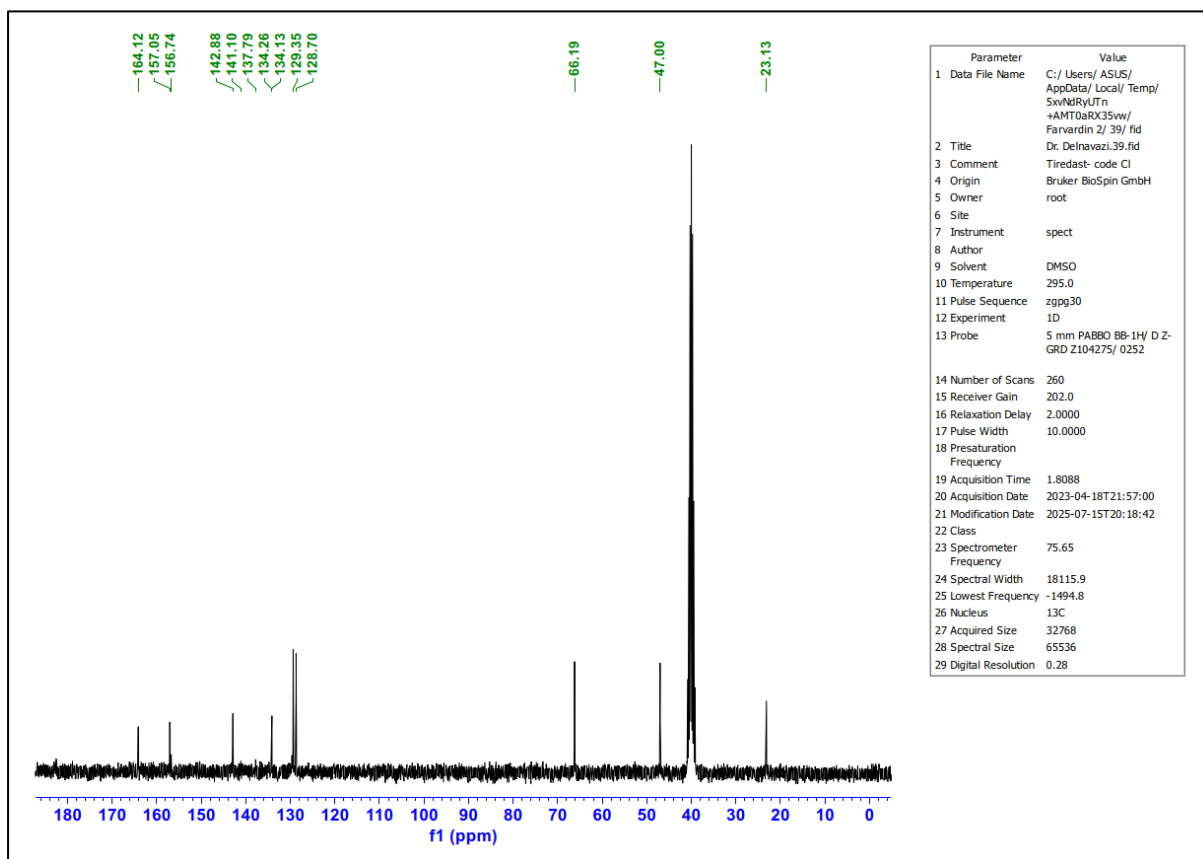

# <sup>1</sup>H NMR spectrum of compound (4e)

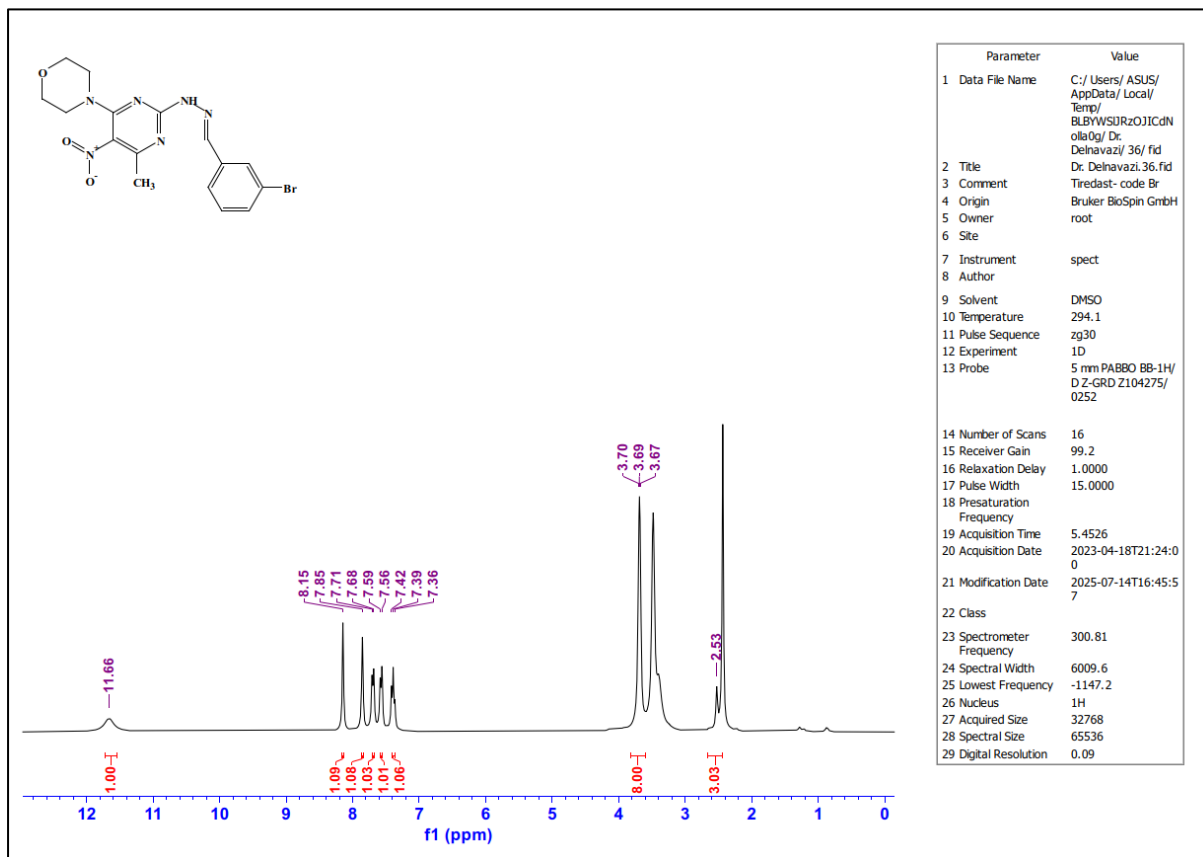

<sup>13</sup>C NMR spectrum of compound (4e)

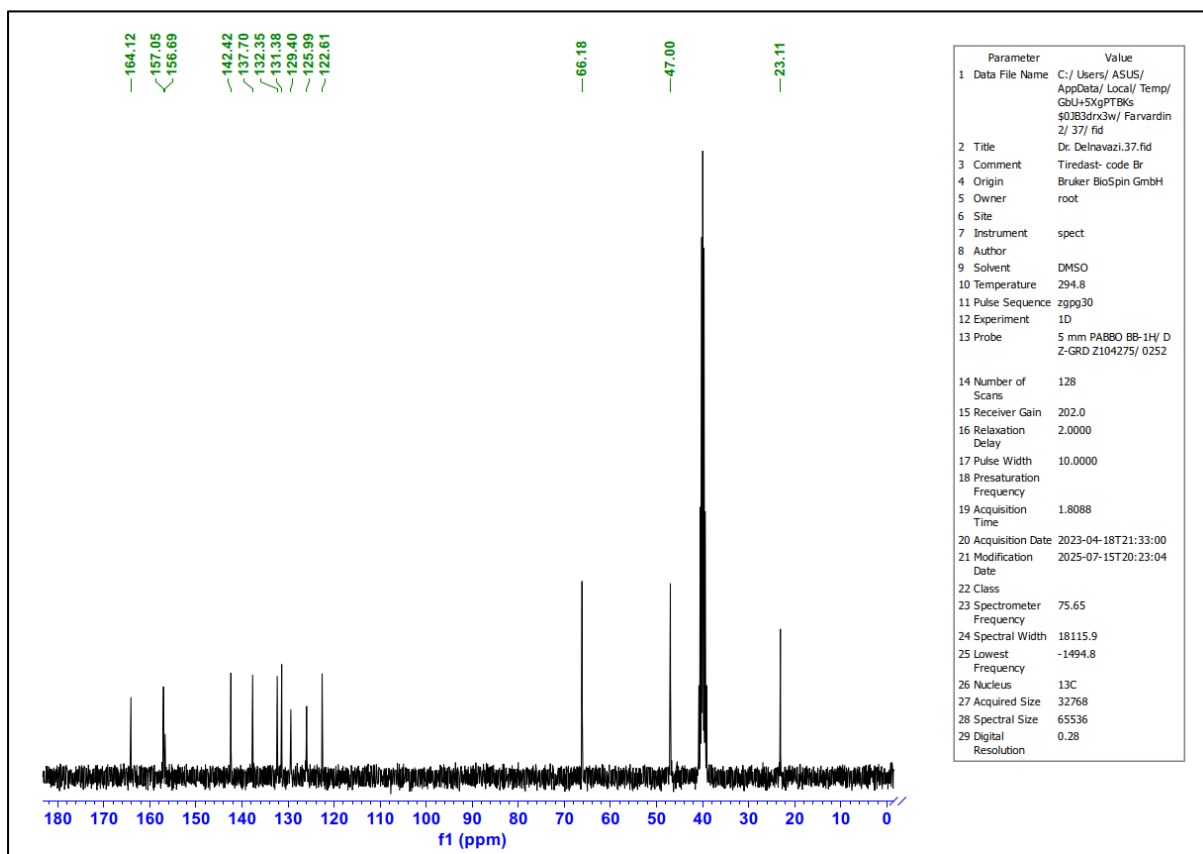

# <sup>1</sup>H NMR spectrum of compound (4f)

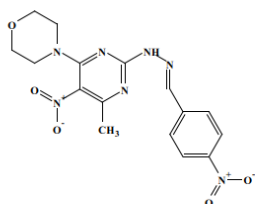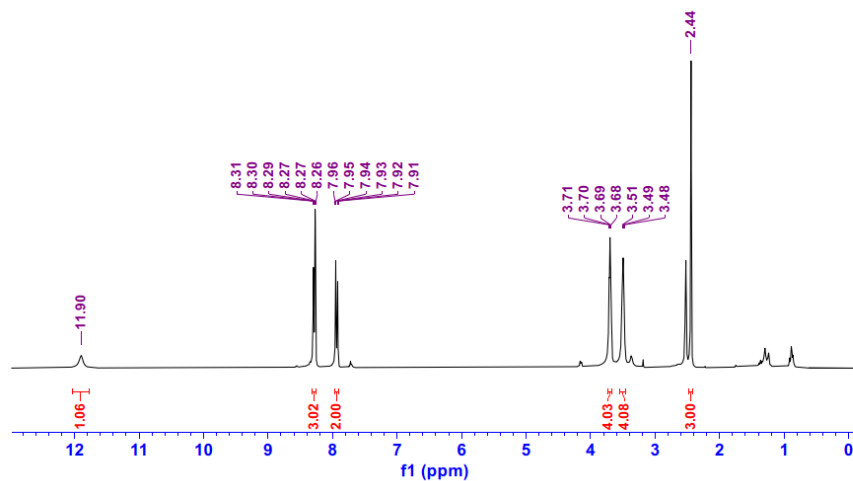

| Parameter             | Value                                                                            |
|-----------------------|----------------------------------------------------------------------------------|
| 1 Data File Name      | C:/Users/ASUS/AppData/Local/Temp/xrfx1ZQeT1HWv4EGTwP6zoA/ Dr. Delhavazi/ 49/ fid |
| 2 Title               | Dr. Delhavazi-49.fid                                                             |
| 3 Comment             | Tiredast- code NO2                                                               |
| 4 Origin              | Bruker BioSpin GmbH                                                              |
| 5 Owner               | root                                                                             |
| 6 Site                |                                                                                  |
| 7 Instrument          | spect                                                                            |
| 8 Author              |                                                                                  |
| 9 Solvent             | DMSO                                                                             |
| 10 Temperature        | 294.4                                                                            |
| 11 Pulse Sequence     | zg30                                                                             |
| 12 Experiment         | 1D                                                                               |
| 13 Probe              | 5 mm PABBO BB-1H/ D Z-GRD Z104275/ 0252                                          |
| 14 Number of Scans    | 88                                                                               |
| 15 Receiver Gain      | 181.4                                                                            |
| 16 Relaxation Delay   | 1.0000                                                                           |
| 17 Pulse Width        | 15.0000                                                                          |
| 18 Presaturation      | Frequency                                                                        |
| 19 Acquisition Time   | 5.4526                                                                           |
| 20 Acquisition Date   | 2023-04-19T14:39:00                                                              |
| 21 Modification Date  | 2025-07-15T18:26:10                                                              |
| 22 Class              |                                                                                  |
| 23 Spectrometer       | 300.81                                                                           |
| 24 Spectral Width     | 6009.6                                                                           |
| 25 Lowest             | -1147.2                                                                          |
| 26 Nucleus            | 1H                                                                               |
| 27 Acquired Size      | 32768                                                                            |
| 28 Spectral Size      | 65536                                                                            |
| 29 Digital Resolution | 0.09                                                                             |

# <sup>13</sup>C NMR spectrum of compound (4f)

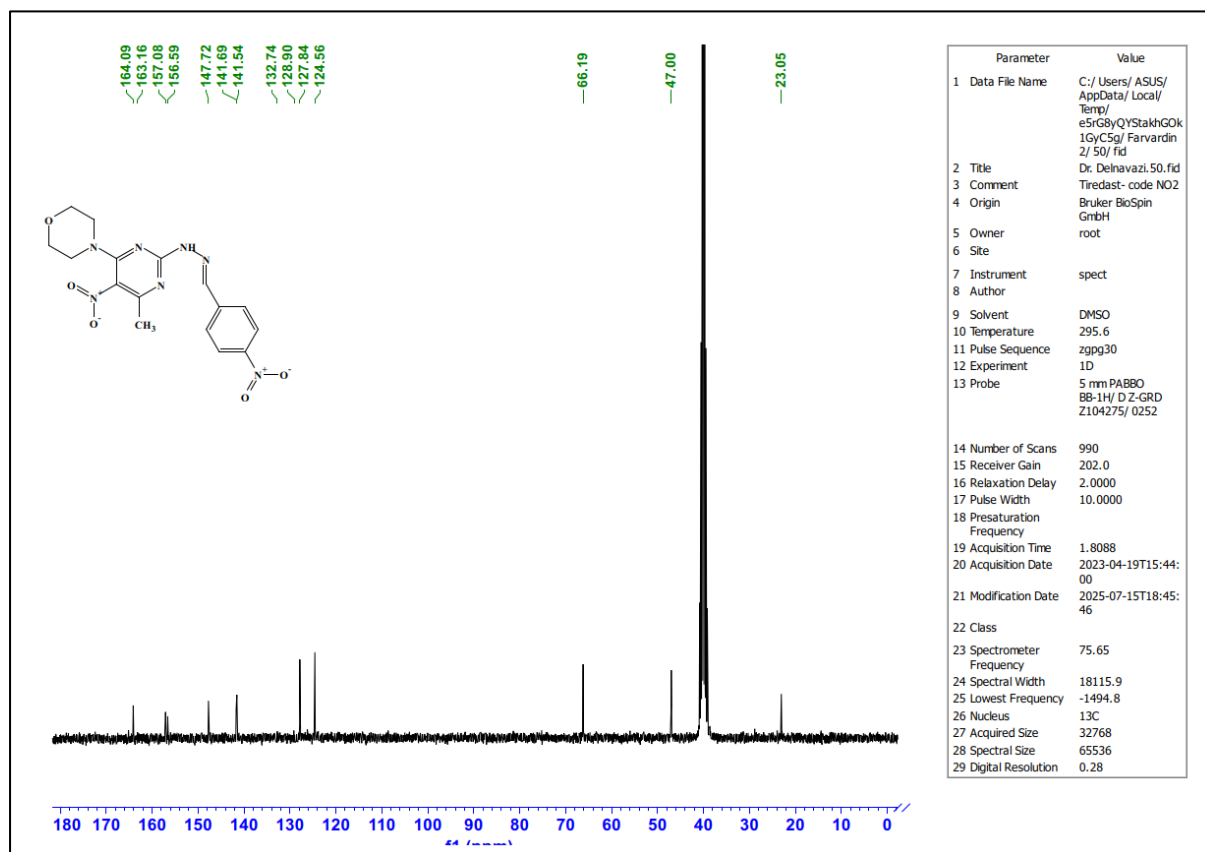

D2O-exchangeable spectrum of compound (4a)

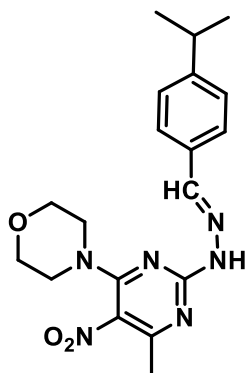

Without D<sub>2</sub>O

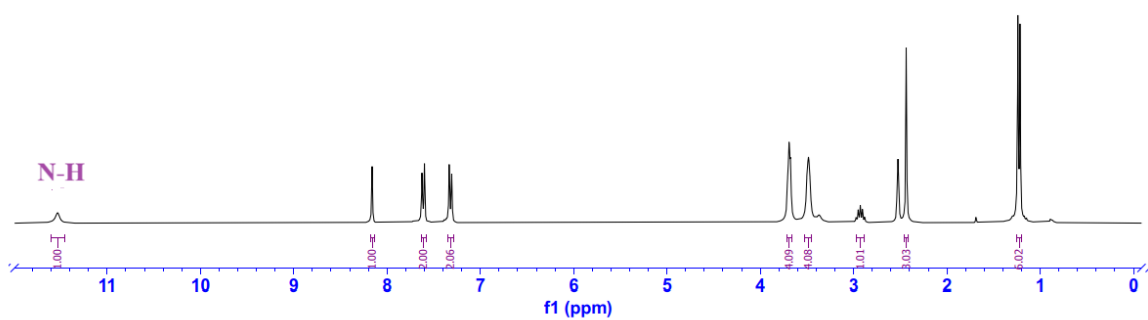

With D<sub>2</sub>O

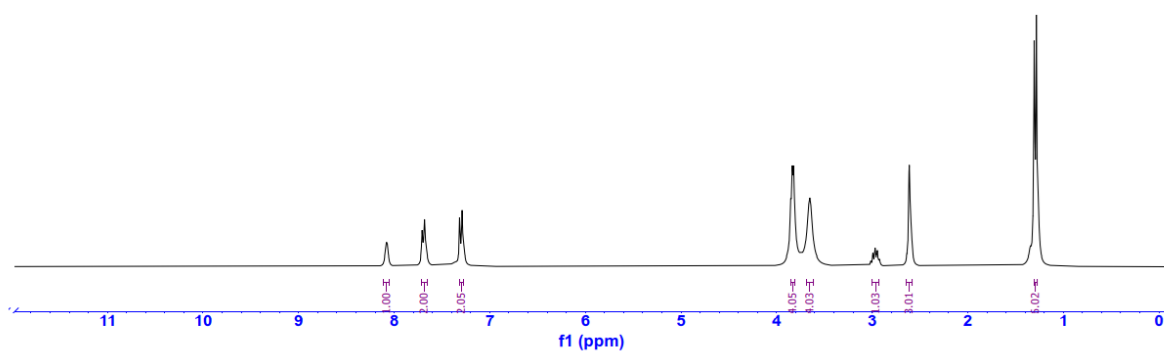

Supplement: d6ra01465h1.pdf [file d6ra01465h1.pdf]
